# Supplementary material for: Receptor tyrosine kinase inhibitors negatively impact on pro-reparative characteristics of human cardiac progenitor cells
Source: Springer Nature journal article supplement (doi:10.1038/s41598-022-13203-3), 2022-06-16
Supplement: MOESM1 [file 41598_2022_13203_MOESM1_ESM.pdf]

# Receptor tyrosine kinase inhibitors negatively impact on pro-reparative characteristics of human cardiac progenitor cells

Andrew J. Smith, Prashant Ruchaya, Robert Walmsley, Kathleen E. Wright, Fiona C. Lewis-McDougall, Jacquelyn Bond, Georgina M. Ellison-Hughes

## SUPPLEMENTARY FIGURE 1

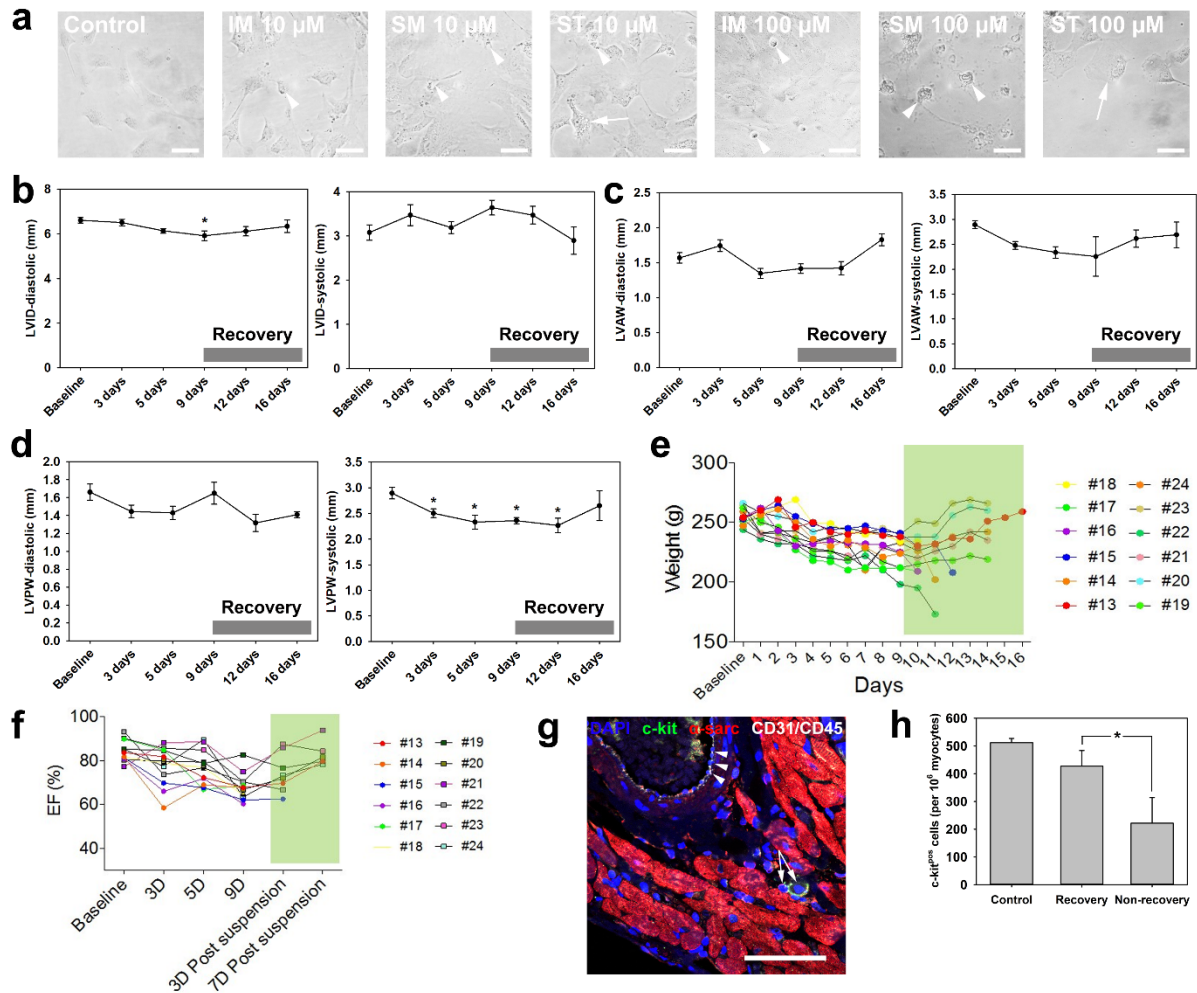

**Supplementary Figure 1 - RTKIs impact upon CPCs *in vitro* and *in vivo*.** Morphological appearances of *in vitro* human CPCs treated with RTKIs were consistent with viability findings (a), with dead cells (arrowheads) and severely-damaged cells (arrows); scale bar=10  $\mu\text{m}$ . Application of SM to adult male Wistar rats *in vivo* caused (b) transient reduction in left ventricular internal diameter during diastole, (c) no change to left ventricular anterior wall thickness and (d) reduced left ventricular posterior wall thickness transient that resolved after cessation of SM (n=12). In addition, SM caused (e) weight reduction over the course of 9 days' treatment followed by recovery for 7 days (individual data series, total n=12). Echocardiography analysis (f) produced a comparable set of individual data series for cardiac ejection fraction (individual data series, total n=12). Green areas indicate recovery period after RTKI application. (g) Representative immunostaining image:  $\alpha$ -sarcomeric actin (red), c-kit (green), DAPI (blue) CD31 and CD45 (white) showing CPC *in situ* (arrow) negative for both CD31 and CD45, with CD31/CD45-

positive cells in nearby vascular tissue (arrowheads); scale bar=50  $\mu\text{m}$ . (h) Analysis of CPC numbers per  $10^6$  cardiomyocytes showed a significant reduction in non-recovery animals ( $p < 0.05$ ,  $n=6$ ).

## SUPPLEMENTARY FIGURE 2

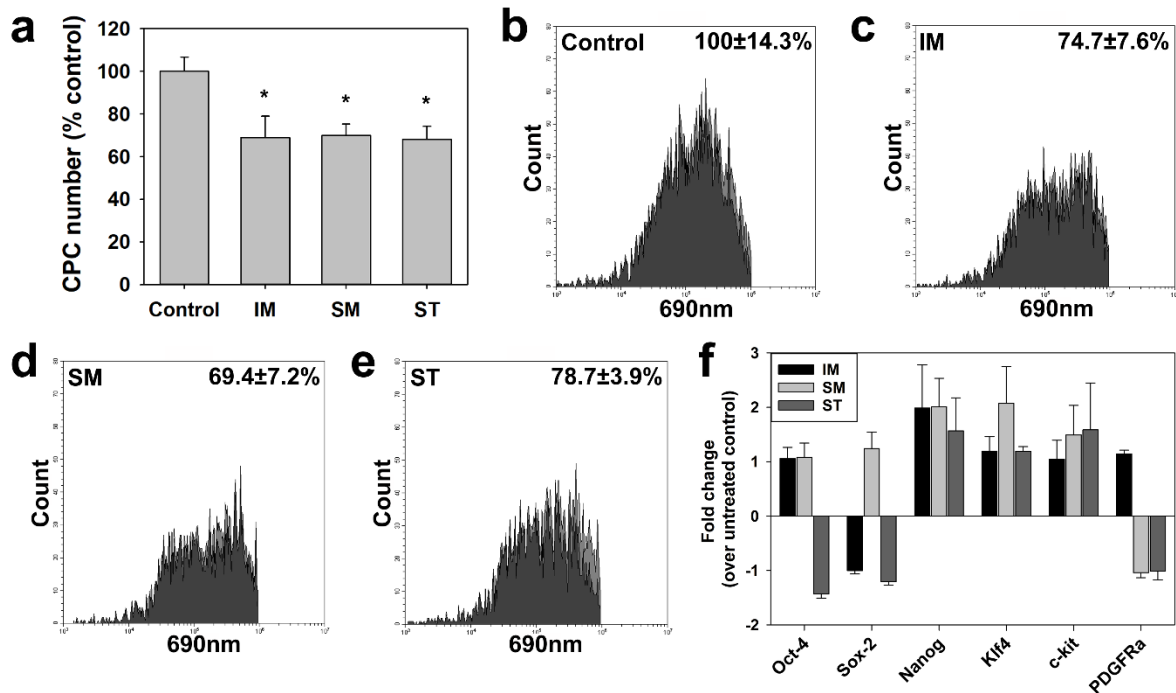

**Supplementary Figure 2 - RTKIs reduce CPC cell numbers but not ‘stemness’.** Analysis of viable CPC numbers after 48 hours RTKI treatment, with (a) dead cells excluded by Trypan blue staining ( $n=4$ ). Further analysis of viable CPC numbers after 48 hours RTKI treatment, with (b-e) dead cells excluded by propidium iodide staining (detected by 690 nm emission): representative flow cytometry plots of control and RTKI-treated CPCs (percentages of untreated control CPC viable cell counts in corner,  $n=3$ ). (f) Real-time qPCR analysis of CPC ‘stemness’ and CPC marker gene expression after 24 hours ( $n=3$ ). All graph data are mean  $\pm$  SEM.

### SUPPLEMENTARY FIGURE 3

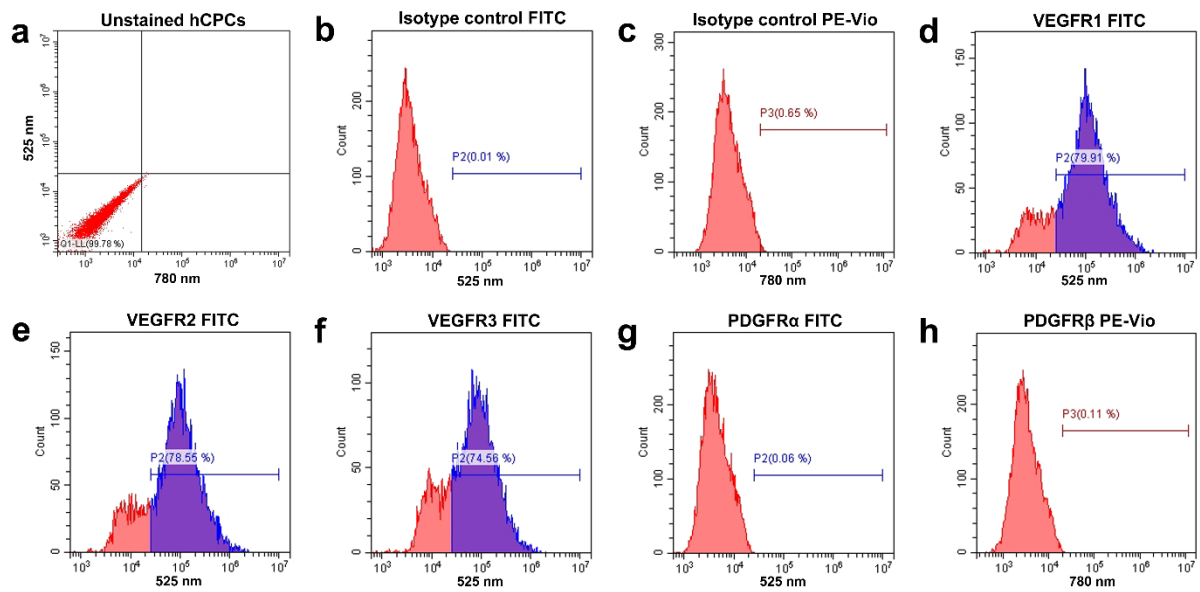

**Supplementary Figure 3 - CPC population expression of RTKs.** Live, unfixed CPCs were analysed by flow cytometry to determine expression of VEGFRs and PDGFRs. (a) Background fluorescence in both channels (525 and 780 nm) were minimal, also when CPCs were stained by isotype control antibodies conjugated with (b) FITC or (c) PE-Vio. Expression levels in CPCs of (d) VEGFR1, (e) VEGFR2, (f) VEGFR3, (g) PDGFR $\alpha$  and (h) PDGFR $\beta$ .

## SUPPLEMENTARY FIGURE 4

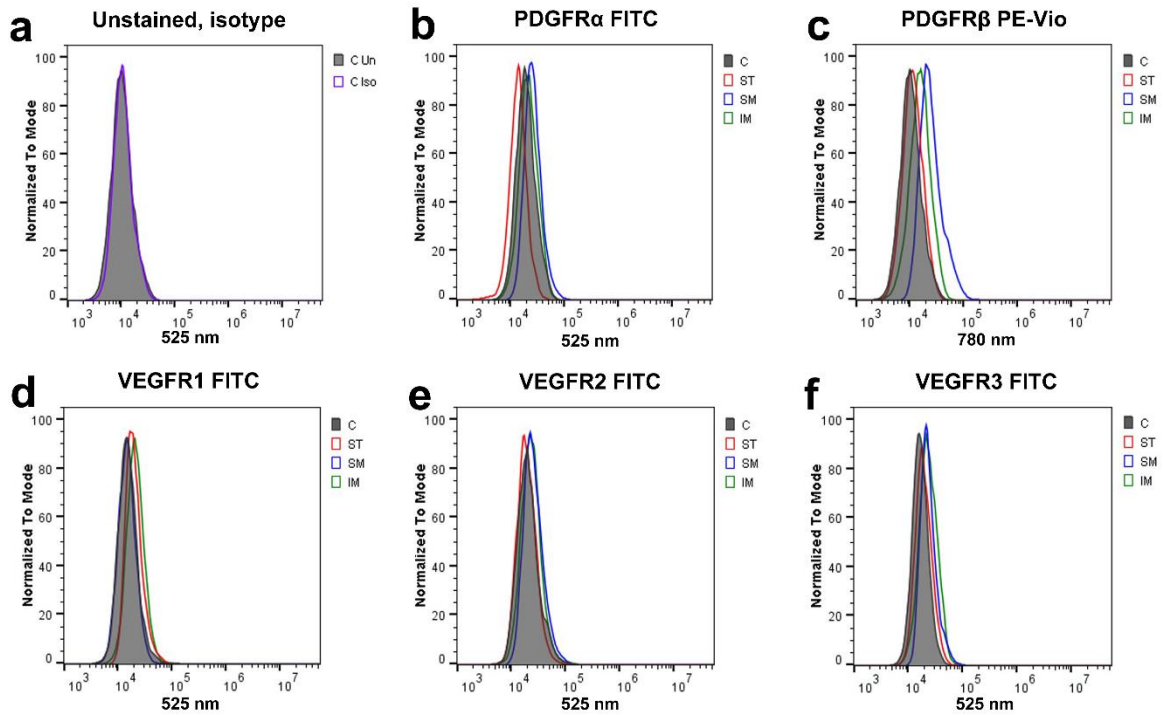

**Supplementary Figure 4 - CPC population expression of RTKs following RTKI exposure.** Live, unfixed CPCs were analysed by flow cytometry to determine expression of VEGFRs and PDGFRs, following treatment with 5  $\mu$ M IM, 0.5  $\mu$ M SM or 5  $\mu$ M ST. Expression levels in treated and untreated CPCs of (a) unstained CPCs, (b) PDGFR $\alpha$ , (c) PDGFR $\beta$ , (d) VEGFR1, (e) VEGFR2 and (f) VEGFR3.

## SUPPLEMENTARY FIGURE 5

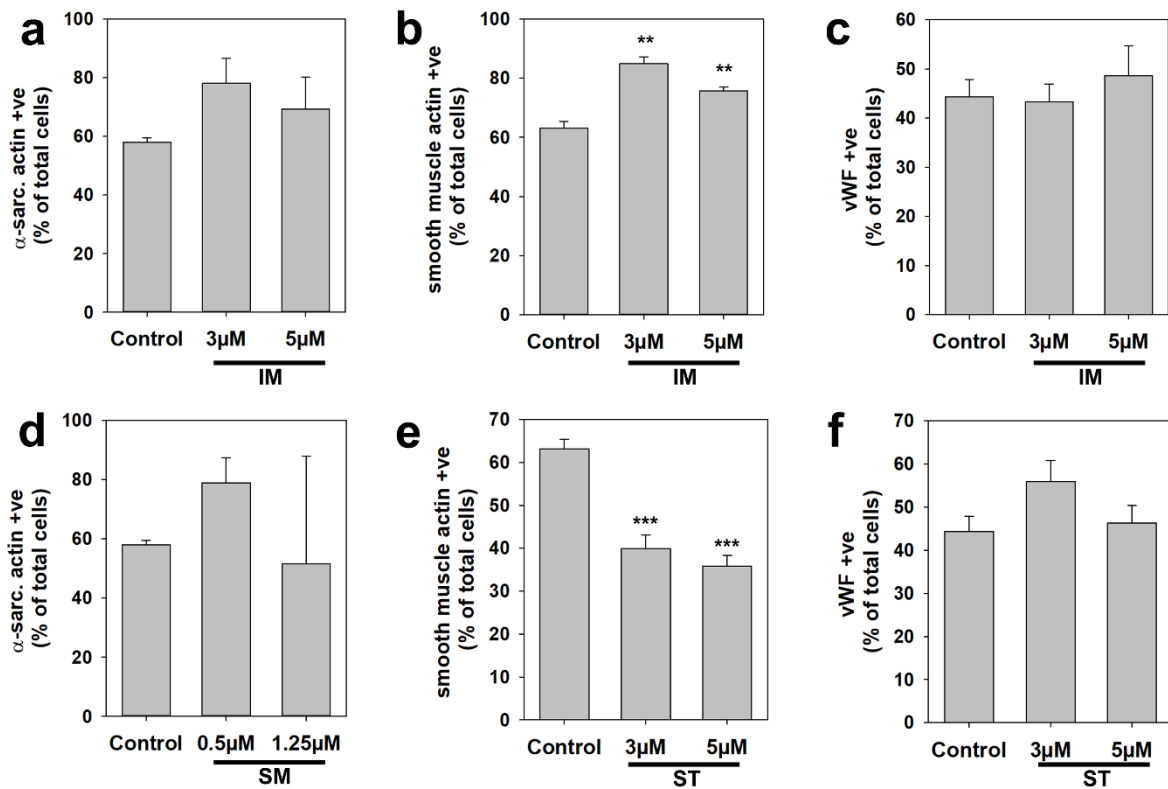

### Supplementary Figure 5 - CPC differentiation potential following RTKI exposure.

Directed differentiation of CPCs *in vitro* determined that: (a) percentage of CPCs expressing  $\alpha$ -sarcomeric actin was unaffected by IM (n=4); (b) percentage of CPCs expressing smooth muscle actin increased in the presence of IM (n=4); (c) percentage of CPCs expressing von Willebrand factor was unaffected by IM (n=4); (d) percentage of CPCs expressing  $\alpha$ -sarcomeric actin was unaffected by SM (n=4); (e) percentage of CPCs expressing smooth muscle actin was reduced by ST (n=4); (f) percentage of CPCs expressing von Willebrand factor was unaffected by ST (n=4). All data are mean $\pm$ SEM; significance was determined by ANOVA with Holm-Šidák *post hoc* test to identify differences (\*\* $p$ <0.01; \*\*\* $p$ <0.001).

**SUPPLEMENTARY FIGURE 6 - Western blot raw image files**

**Figure 2g (c-kit)**

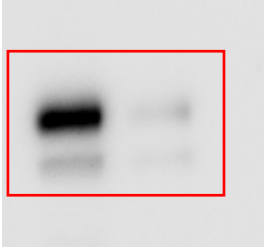

**Figure 3b (Nkx2.5)**

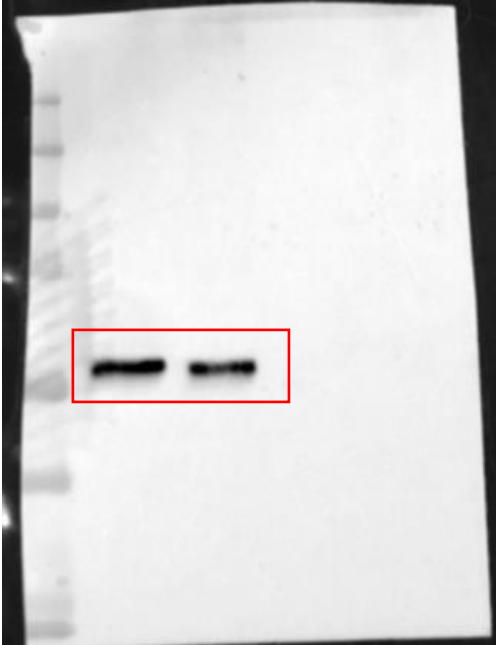

**Figure 3d (PECAM-1)**

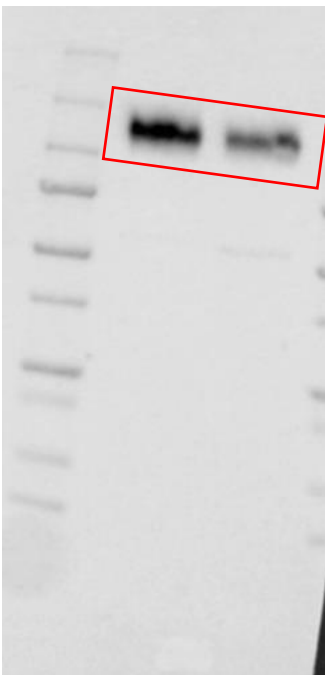

**Figure 3d (Nkx2.5)**

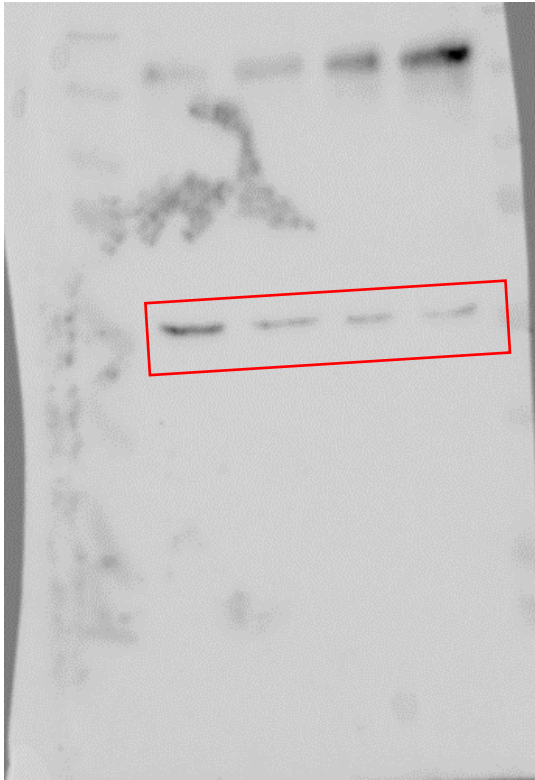

**Figure 4b (HGF)**

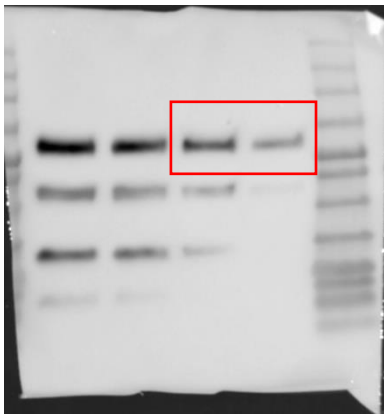

**Figure 4d (HGF)**

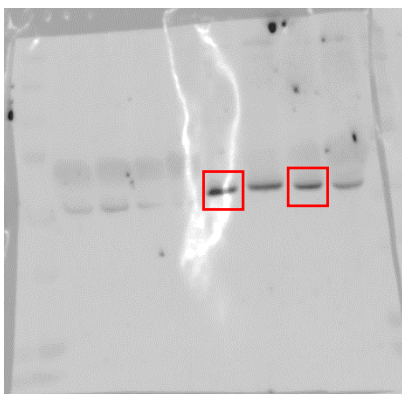

Figure 4d (PDGF-A)

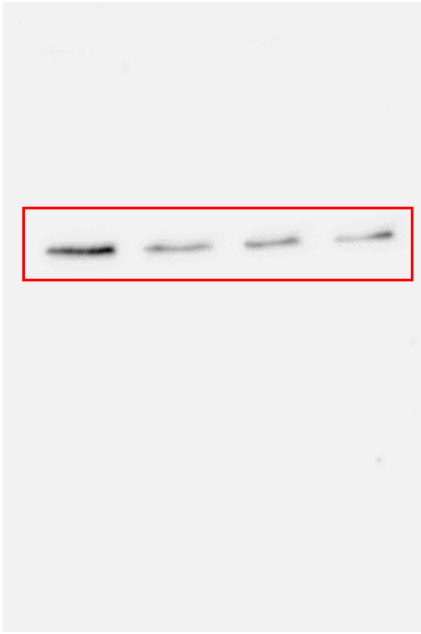

Figure 4d (Wnt2)

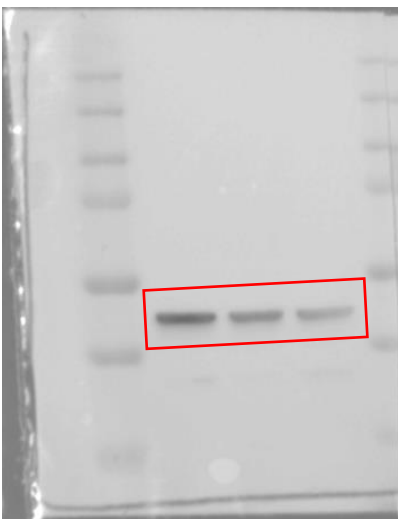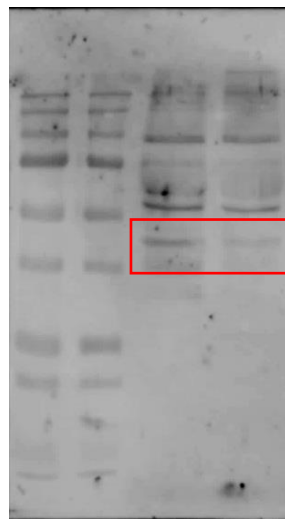



**Figure 4f (Akt1, pAkt1)**

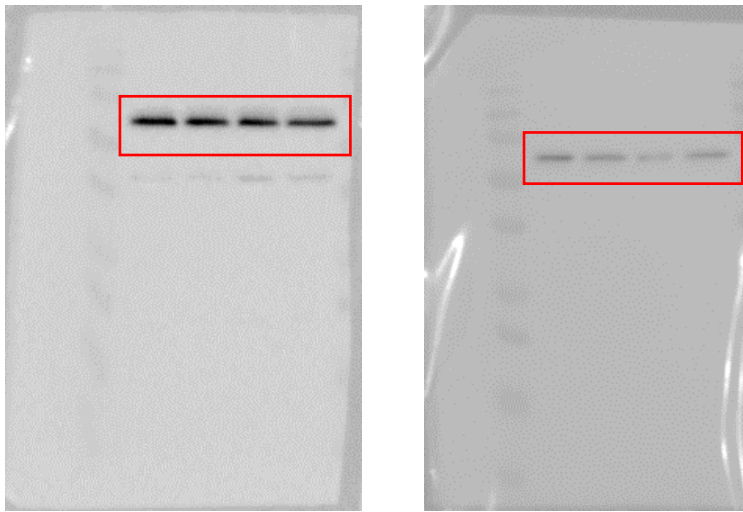

**Figure 4f (p38, pp38)**

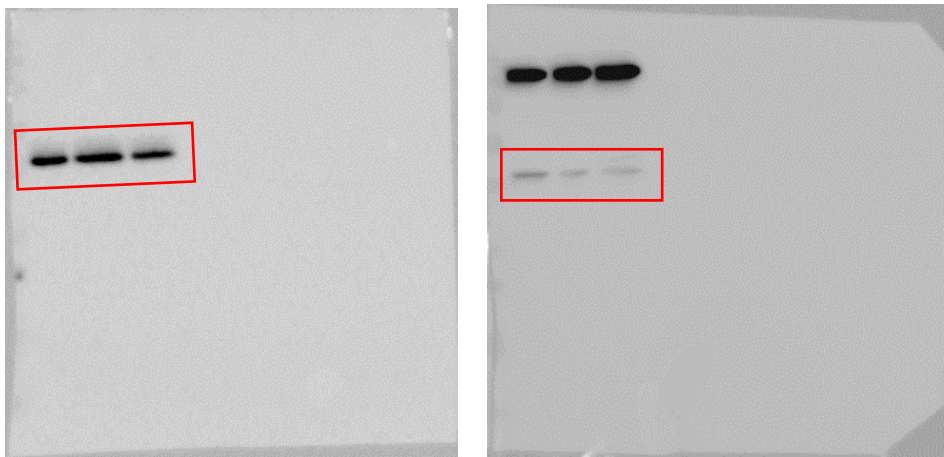

**Figure 5a (Akt1, pAkt1)**

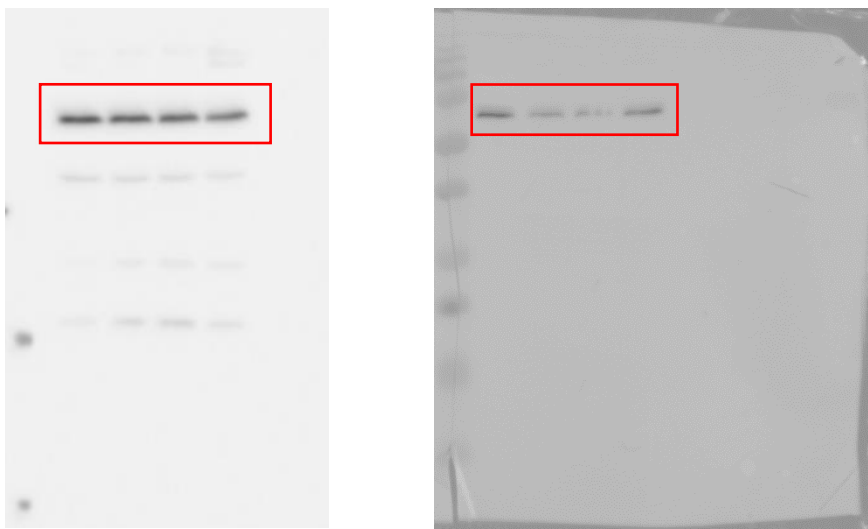

Figure 5b (p38, pp38)

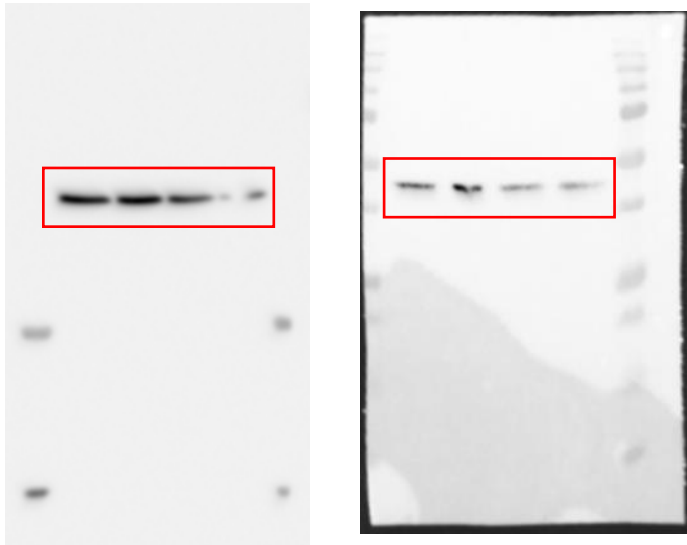

Figure 5d (c-kit)

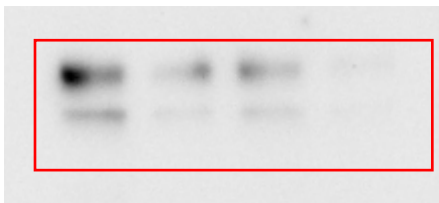

Figure 5f (HGF)

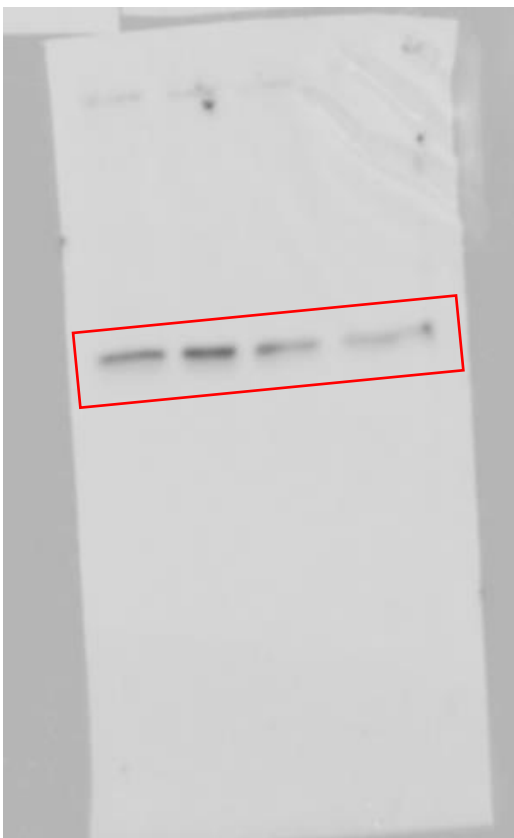

**Figure 5h (c-kit)**

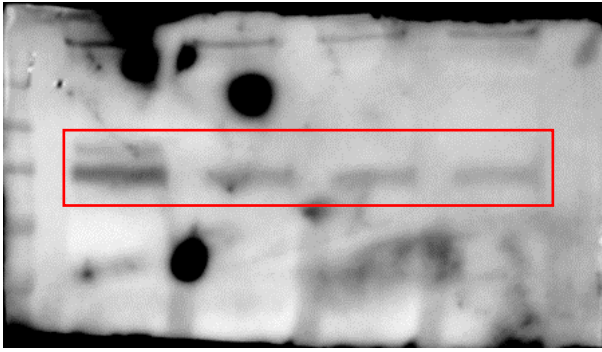

**Figure 5j (EGF)**

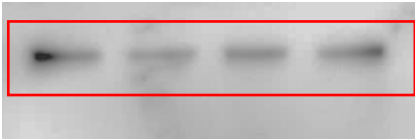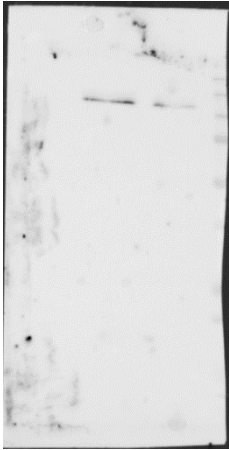

**Figure 5j (HGF)**

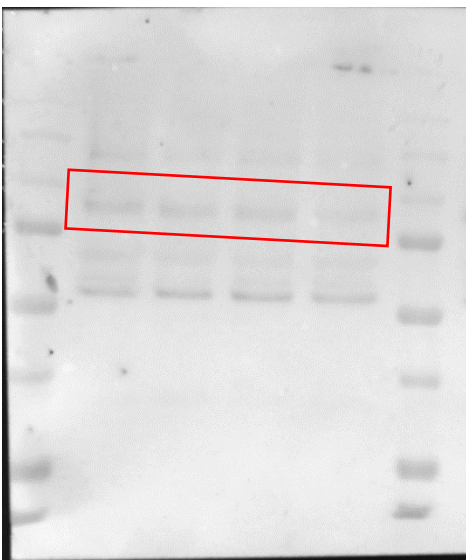

**SUPPLEMENTARY FIGURE 6 - Western blot  $\beta$ -actin raw image files**

**Figure 2g (c-kit)**

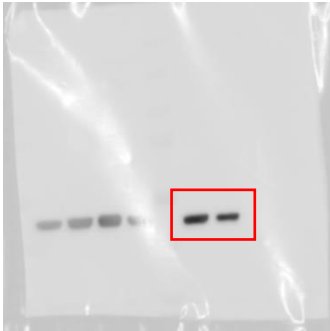

**Figure 3b (Nkx2.5)**

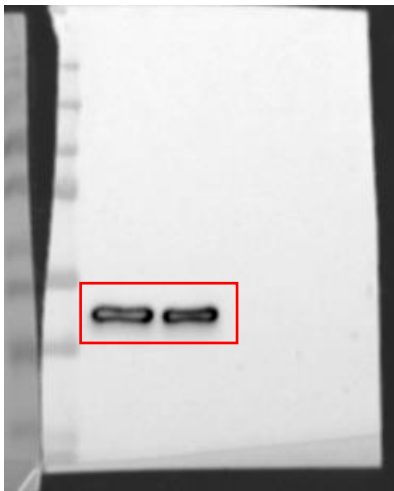

**Figure 3d (PECAM-1)**

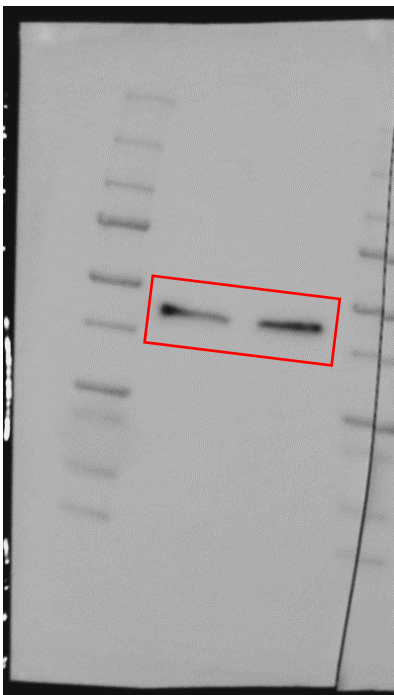

**Figure 3d (Nkx2.5)**

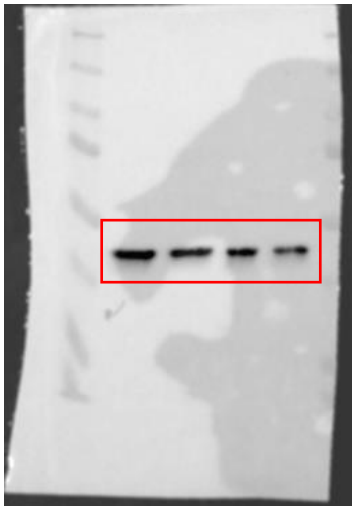

**Figure 4b (HGF)**

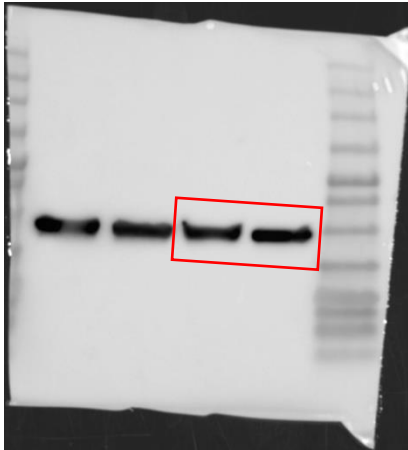

**Figure 4d (HGF)**

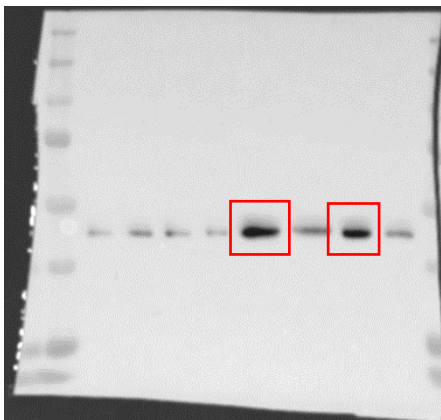

Figure 4d (PDGF-A)

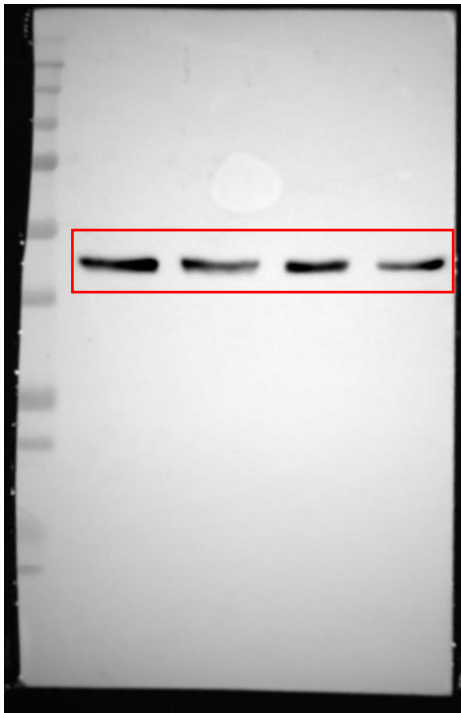

Figure 4d (Wnt2)

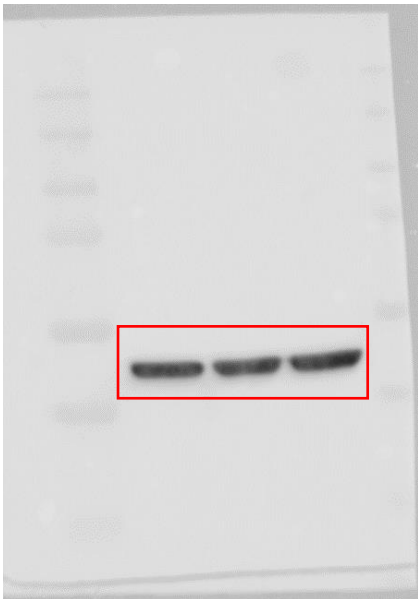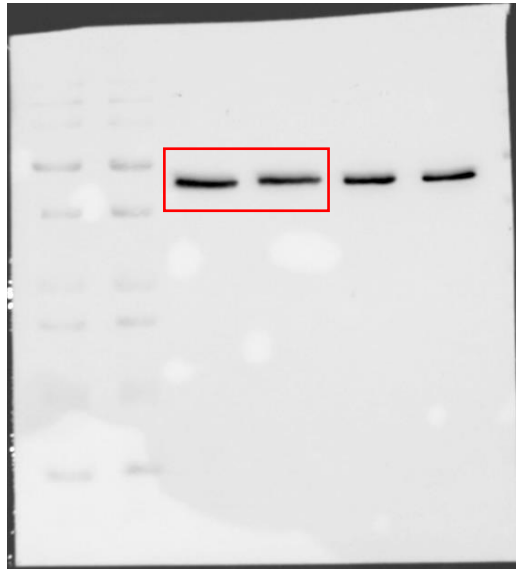

**Figure 4f (Akt1)**

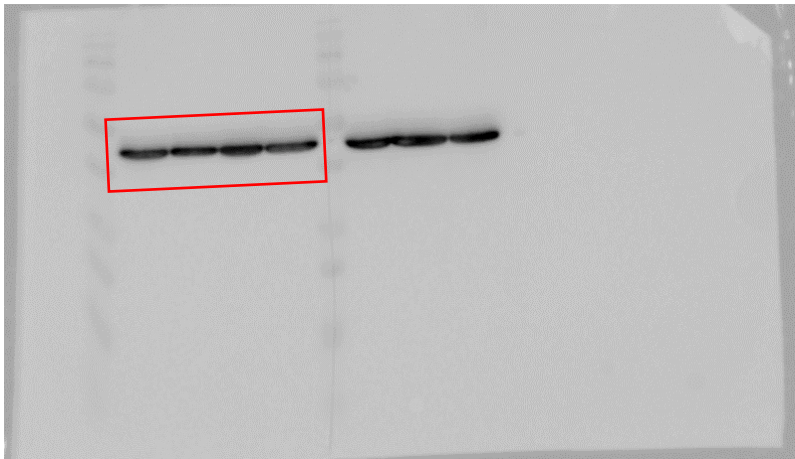

**Figure 4f (p38)**

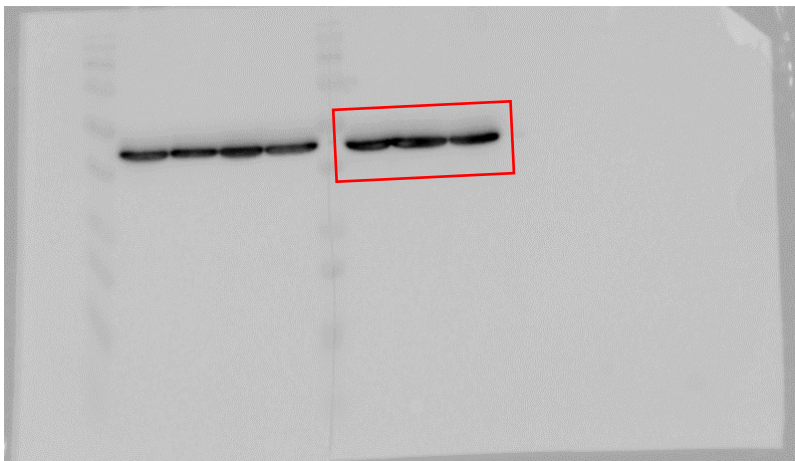

**Figure 5a (Akt1)**

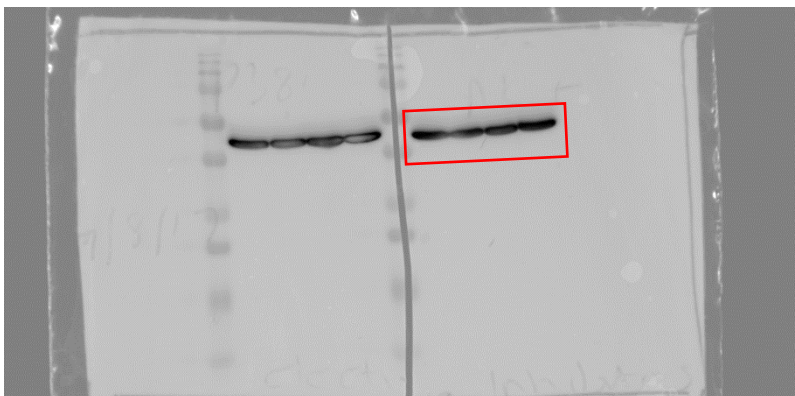

**Figure 5b (p38)**

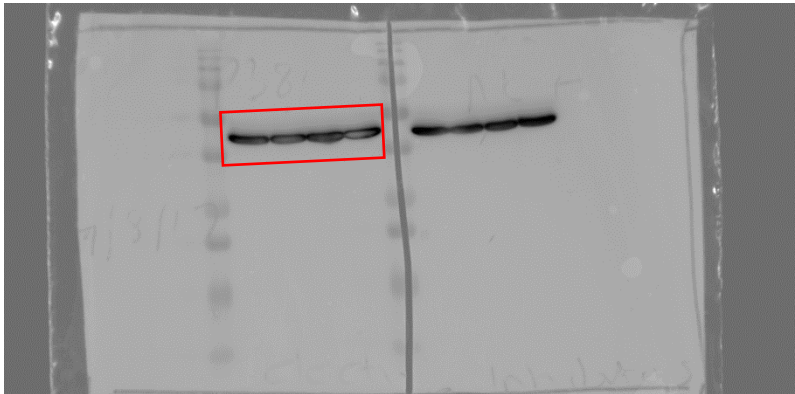

**Figure 5d (c-kit)**

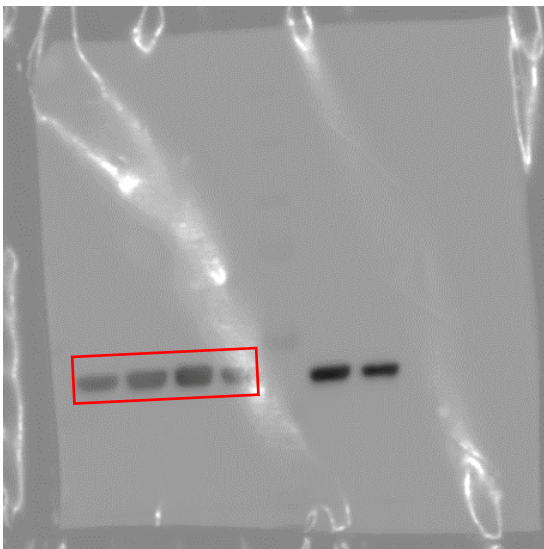

**Figure 5f (HGF)**

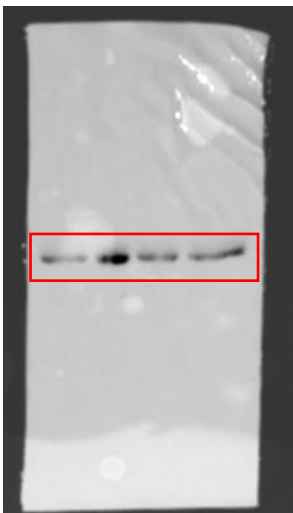



Figure 5h (c-kit)

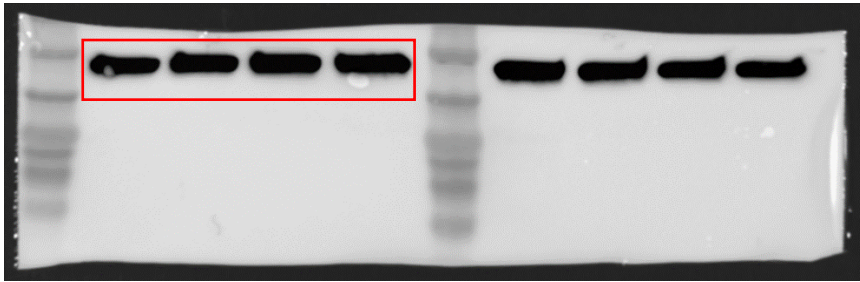

Figure 5j (EGF)

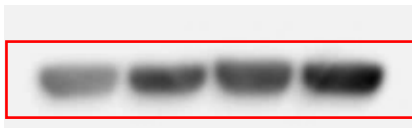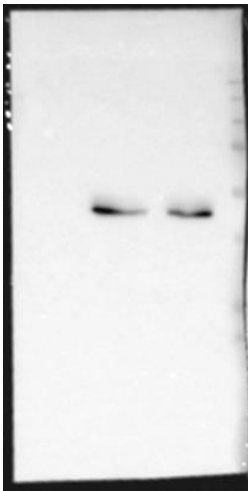

Figure 5j (HGF)

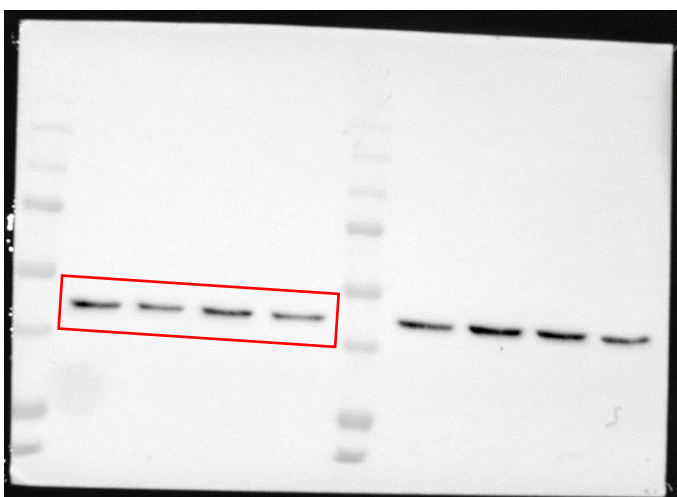

## Supplementary Table 1 - primer sequences

| Target gene    | Forward sequence (5'-3')  | Reverse sequence (3'-5') | Accession number   |
|----------------|---------------------------|--------------------------|--------------------|
| Oct-4          | GATGGCGTACTGTGGGCC        | CAAAACCCGGAGGAGTCCCA     | NM_002701.6        |
| Sox-2          | GGGAAAGTAGTTTGCTGCC       | CGCCGCCGATGATTGTTATT     | NM_003106.4        |
| Nanog          | TGGTGTGACGCAGAAGGC        | TGCACCAGGTCTGAGTGTTTC    | NM_024865.4        |
| Klf4           | AAGCCAAAGAGGGGAAGACG      | CATGTGTAAGGCGAGGTGGT     | NM_00131405<br>2.2 |
| c-kit          | AGGAAACGCTCGACTACCTG      | CATTCCAGGATAGGGGCTGC     | NM_00138528<br>6.1 |
| PDGFR $\alpha$ | CGGAGGAGAAGTTTCCCAGAG     | CTGCTCACTTCCAAGACCGT     | NM_00134782<br>7.2 |
| GATA-4         | CGACACCCCAATCTCGATATGTT   | ACAGATAGTGACCCGTCCCA     | NM_002052.5        |
| GATA-6         | AAGCGCGTGCCTTCATCA        | CATAGCAAGTGGTCTGGGCA     | NM_005257.6        |
| PECAM-1        | GAAATGTCCAGGCCAGCAGT      | ATCTGCTTTCCACGGCATCA     | NM_000442.5        |
| Nkx2.5         | CAAGTGTGCGTCTGCCTTTC      | CACAGCTCTTTCTTTTCGGCTC   | NM_004387.4        |
| EGF            | GGGAGCCTGAGCAGAAACTT      | CTACAGGGCACGTGCAGTAA     | NM_001963.6        |
| FGF-2          | CAAGCGGCTGTACTGCAAAA      | TAGCTTGATGTGAGGGTCCG     | NM_00136166<br>5.2 |
| HGF            | CAATGCCTCTGGTTCCCCTT      | GGCAAAAAGCTGTGTTCTGTG    | NM_000601.6        |
| IGF-1          | CTCCCCTGTCTTCCCAGAGA      | GTGCCCAACTACAACATCCCT    | NM_000875.5        |
| PDGF-A         | TGTTTCTCCTCCTCCTGGCT      | GGATCTCGGCTTCCTCGG       | NM_002607.6        |
| WNT2           | CTCCGAAGTAGTCGGGAATCTG    | TGCCAGCTCTGTTGTTGTGA     | NM_003391.3        |
| Akt1           | GCATCCTGGTCTGTCTTCC       | CTGGCCACAGCCTCTGATG      | NM_005163.2        |
| Akt2           | AAGAAGGCTGGCTCCACAAG      | CATCCACTCCTCCCTCTCGT     | NM_001626.6        |
| ERK1           | GTCAGACTCCAAAGCCCTTGA     | TGTCTGTCTGGGCTAGGGG      | NM_002746.3        |
| p38            | CCCCTTATCTCATTAAACAGGATG  | AGGTCAGGCTTTTCCAATCAT    | NM_001315.3        |
| PI3K           | GGGCGGGTGAAGCTC           | AGTCCTCTCACTGGCTTCCT     | NM_181523.3        |
| PKC            | AGGACTGATGACCAAACACCC     | CTCCTTTGCCACACACTTTGG    | NM_002737.3        |
| AMPK           | AAGAATGGAAGGCTGGATGAAAAAG | GGCCTGCATACAATCTTCCT     | NM_006251.5        |
| GSK3           | CCGTCTCTCAACGCCATTCT      | CTTCCCACGCCCTCTTGG       | NM_019884.3        |
| GAPDH          | GTCAAGGCTGAGAACGGGAA      | AAATGAGCCCCAGCCTTCTC     | NM_002046.7        |
| B-actin        | GTGGCATCCACGAAACTACC      | GTAATTGCGCTCAGGAGGAG     | NM_001101.5        |

**Supplementary Table 2 - antibodies**

| Antigen                    | Manufacturer      | Cat. number | Application    |
|----------------------------|-------------------|-------------|----------------|
| c-kit                      | R&D Systems       | AF1356      | IHC            |
| $\alpha$ -sarcomeric actin | Sigma             | A2127       | IHC, ICC       |
| CD31                       | Abcam             | ab182981    | IHC            |
| CD45                       | Abcam             | ab10558     | IHC            |
| BrdU                       | Merck             | 11296736001 | ICC            |
| Ki67                       | BD Biosciences    | BD556003    | ICC            |
| Smooth muscle actin        | Sigma             | A2547       | ICC            |
| von Willebrand factor      | Dako              | A0082       | ICC            |
| c-kit                      | R&D Systems       | AF1356      | Western blot   |
| $\beta$ -actin             | Cell Signaling    | #3700       | Western blot   |
| Nkx2.5                     | GeneTex           | GTX105711   | Western blot   |
| PECAM-1                    | R&D systems       | AF806       | Western blot   |
| HGF                        | Santa Cruz        | sc-374422   | Western blot   |
| PDGF-A                     | Santa Cruz        | sc-9974     | Western blot   |
| EGF                        | GeneTex           | GTX111176   | Western blot   |
| Wnt2                       | R&D Systems       | AF3464      | Western blot   |
| Akt1                       | Cell Signaling    | #2938       | Western blot   |
| Phospho-Akt1               | Cell Signaling    | #9018       | Western blot   |
| p38                        | Cell Signaling    | #9212       | Western blot   |
| Phospho-p38                | Cell Signaling    | #9211       | Western blot   |
| Isotype control (PE-Vio)   | Miltenyi          | 130-108-377 | Flow cytometry |
| Isotype control (FITC)     | Miltenyi          | 130-099-119 | Flow cytometry |
| Anti-rabbit IgG Fluor-488  | Life Technologies | 10424752    | Flow cytometry |
| VEGFR1                     | Enogene           | E11-0594B   | Flow cytometry |
| VEGFR2                     | Enogene           | E02-1078    | Flow cytometry |
| VEGFR3                     | Bioss             | bs-1083R    | Flow cytometry |
| PDGFR $\alpha$ -FITC       | Miltenyi          | 130-115-336 | Flow cytometry |
| PDGFR $\beta$ -PE-Vio      | Miltenyi          | 130-105-323 | Flow cytometry |
